# Supplementary material for: A highly expressed miR-101 isomiR is a functional silencing small RNA
Source: PubMed Central journal article supplement (PMC3751341; doi:10.1186/1471-2164-14-104), 2013-02-15
Supplement: 1471-2164-14-104-S1.pdf [file 1471-2164-14-104-S1.pdf]

**Figure 1**

| Sequence                      | Frequency   | Lenght    | 5'-<br>Trim.<br>variants | 3'-<br>Trim.<br>variants | 3'-Add.<br>variants | 3'-Nt<br>Subtit.<br>variants |
|-------------------------------|-------------|-----------|--------------------------|--------------------------|---------------------|------------------------------|
| ACAGUACUGUGAUAACUGA           | 38          | 19        | 1-down A                 | 1-up A                   | -                   | -                            |
| ACAGUACUGUGAUAACUGAA          | 43          | 20        | 1-down A                 | -                        | -                   | -                            |
| ACAGUACUGUGAUAACUGAAA         | 20          | 21        | 1-down A                 | -                        | 1-A                 | -                            |
| ACAGUACUGUGAUAACUGAAG         | 13          | 21        | 1-down A                 | 1-down G                 | -                   | -                            |
| AUACAGUACUGUGAUAACUGA         | 14          | 21        | 1-up G                   | 1-up A                   | -                   | 1AG                          |
| GCACAGUACUGUGAUAACUGA         | 11          | 21        | 1-up G                   | 1-up A                   | -                   | 2CU                          |
| GGACAGUACUGUGAUAACUGA         | 41          | 21        | 1-up G                   | 1-up A                   | -                   | 2GU                          |
| GGACAGUACUGUGAUAACUGAA        | 26          | 22        | 1-up G                   | -                        | -                   | 2GU                          |
| GGACAGUACUGUGAUAACUGAAA       | 11          | 23        | 1-up G                   | -                        | 1-A                 | 2GU                          |
| GUAAAGUACUGUGAUAACUGA         | 14          | 21        | 1-up G                   | 1-up A                   | -                   | 4AC                          |
| GUAAAGUACUGUGAUAACUGAA        | 19          | 22        | 1-up G                   | -                        | -                   | 4AC                          |
| GUACAGGACUGUGAUAACUGA         | 15          | 21        | 1-up G                   | 1-up A                   | -                   | 7GU                          |
| GUACAGGACUGUGAUAACUGAA        | 14          | 22        | 1-up G                   | -                        | -                   | 7GU                          |
| GUACAGUAAUGUGAUAACUGA         | 36          | 21        | 1-up G                   | 1-up A                   | -                   | 9AC                          |
| GUACAGUAAUGUGAUAACUGAA        | 24          | 22        | 1-up G                   | -                        | -                   | 9AC                          |
| GUACAGUACUGGGAUAACUGA         | 20          | 21        | 1-up G                   | 1-up A                   | -                   | 12GU                         |
| GUACAGUACUGGGAUAACUGAA        | 17          | 22        | 1-up G                   | -                        | -                   | 12GU                         |
| GUACAGUACUGUGAGAACUGAA        | 10          | 22        | 1-up G                   | -                        | -                   | 15GU                         |
| GUACAGUACUGUGAUAAACU          | 906         | 19        | 1-up G                   | 3-up GAA                 | -                   | -                            |
| GUACAGUACUGUGAUAAACUA         | 43          | 20        | 1-up G                   | 3-up GAA                 | 1-A                 | -                            |
| GUACAGUACUGUGAUAAACUAA        | 35          | 21        | 1-up G                   | 3-up GAA                 | 2-AA                | -                            |
| GUACAGUACUGUGAUAAACUAAA       | 12          | 22        | 1-up G                   | 3-up GAA                 | 3-AAA               | -                            |
| GUACAGUACUGUGAUAAACUG         | 519         | 20        | 1-up G                   | 2-up AA                  | -                   | -                            |
| <b>GUACAGUACUGUGAUAAACUGA</b> | <b>7474</b> | <b>21</b> | <b>1-up G</b>            | <b>1-up A</b>            | <b>-</b>            | <b>-</b>                     |
| GUACAGUACUGUGAUAAACUGAA       | 5766        | 22        | 1-up G                   | -                        | -                   | -                            |
| GUACAGUACUGUGAUAAACUGAAA      | 1813        | 23        | 1-up G                   | -                        | 1-A                 | -                            |
| GUACAGUACUGUGAUAAACUGAAAA     | 380         | 24        | 1-up G                   | -                        | 2-AA                | -                            |
| GUACAGUACUGUGAUAAACUGAAAAA    | 79          | 25        | 1-up G                   | -                        | 3-AAA               | -                            |
| GUACAGUACUGUGAUAAACUGAAG      | 16          | 23        | 1-up G                   | 1-down G                 | -                   | -                            |
| GUACAGUACUGUGAUAAACUGAAU      | 20          | 23        | 1-up G                   | -                        | 1-U                 | -                            |
| GUACAGUACUGUGAUAAACUGAC       | 72          | 22        | 1-up G                   | 1-up A                   | 1-C                 | -                            |
| GUACAGUACUGUGAUAAACUGAU       | 49          | 22        | 1-up G                   | 1-up A                   | 1-U                 | -                            |
| GUACAGUACUGUGAUAAACUGU        | 202         | 21        | 1-up G                   | 2-up AA                  | 1-U                 | -                            |
| GUACAGUACUGUGAUAAACUGUA       | 25          | 22        | 1-up G                   | 2-up AA                  | 2-UA                | -                            |
| GUACAGUACUGUGAUAAACUGUAA      | 13          | 23        | 1-up G                   | 2-up AA                  | 3-UAA               | -                            |
| GUACAGUACUGUGAUAAACUGUU       | 14          | 22        | 1-up G                   | 2-up AA                  | 2-UU                | -                            |
| GUACAGUACUGUGAUAAACUUA        | 24          | 21        | 1-up G                   | 3-up GAA                 | 2-UA                | -                            |
| GUACAGUACUGUGAUAAUUGA         | 13          | 21        | 1-up G                   | 1-up A                   | -                   | 18UC                         |
| GUACAGUACUGUGAUAAUUGAA        | 11          | 22        | 1-up G                   | -                        | -                   | 18UC                         |
| GUACAGUACUGUGAUACCUGA         | 48          | 21        | 1-up G                   | 1-up A                   | -                   | 17CA                         |
| GUACAGUACUGUGAUACCUGAA        | 27          | 22        | 1-up G                   | -                        | -                   | 17CA                         |
| GUACAGUACUGUGAUACCUGAAA       | 11          | 23        | 1-up G                   | -                        | 1-A                 | 17CA                         |
| GUACAGUACUGUGAUCACUGA         | 18          | 21        | 1-up G                   | 1-up A                   | -                   | 16CA                         |
| GUACAGUACUGUGAUCACUGAA        | 10          | 22        | 1-up G                   | -                        | -                   | 16CA                         |
| GUACAGUACUUUGAUAAACUGA        | 16          | 21        | 1-up G                   | 1-up A                   | -                   | 11UG                         |
| GUACAGUACUUUGAUAAACUGAA       | 17          | 22        | 1-up G                   | -                        | -                   | 11UG                         |

|                               |             |           |          |           |          |          |
|-------------------------------|-------------|-----------|----------|-----------|----------|----------|
| GUACAGUAUUGUGAUAAACUGA        | 24          | 21        | 1-up G   | 1-up A    | -        | 9UC      |
| GUACAGUAUUGUGAUAAACUGAA       | 24          | 22        | 1-up G   | -         | -        | 9UC      |
| GUAGAGUACUGUGAUAAACUGA        | 11          | 21        | 1-up G   | 1-up A    | -        | 4GC      |
| GUAGAGUACUGUGAUAAACUGAA       | 11          | 22        | 1-up G   | -         | -        | 4GC      |
| UAAAGUACUGUGAUAAACUGA         | 17          | 20        | -        | 1-up A    | -        | 3AC      |
| UAAAGUACUGUGAUAAACUGAA        | 20          | 21        | -        | -         | -        | 3AC      |
| UAAAGUACUGUGAUAAACUGAAA       | 10          | 22        | -        | -         | 1-A      | 3AC      |
| UACAGGACUGUGAUAAACUGA         | 13          | 20        | -        | 1-up A    | -        | 6GU      |
| UACAGGACUGUGAUAAACUGAA        | 22          | 21        | -        | -         | -        | 6GU      |
| UACAGGACUGUGAUAAACUGAAA       | 13          | 22        | -        | -         | 1-A      | 6GU      |
| UACAGUAAUGUGAUAAACUGA         | 35          | 20        | -        | 1-up A    | -        | 8AC      |
| UACAGUAAUGUGAUAAACUGAA        | 44          | 21        | -        | -         | -        | 8AC      |
| UACAGUAAUGUGAUAAACUGAAA       | 20          | 22        | -        | -         | 1-A      | 8AC      |
| UACAGUACUGGGAUAAACUGA         | 57          | 20        | -        | 1-up A    | -        | 11GU     |
| UACAGUACUGGGAUAAACUGAA        | 51          | 21        | -        | -         | -        | 11GU     |
| UACAGUACUGGGAUAAACUGAAA       | 28          | 22        | -        | -         | 1-A      | 11GU     |
| UACAGUACUGUGAUAAAUGA          | 16          | 20        | -        | 1-up A    | -        | 17AC     |
| UACAGUACUGUGAUAAAUGAA         | 16          | 21        | -        | -         | -        | 17AC     |
| UACAGUACUGUGAUAAACUA          | 16          | 19        | -        | 3-up GAA  | 1-A      | -        |
| UACAGUACUGUGAUAAACUG          | 356         | 19        | -        | 2-up AA   | -        | -        |
| UACAGUACUGUGAUAAACUGA         | 6656        | 20        | -        | 1-up A    | -        | -        |
| <b>UACAGUACUGUGAUAAACUGAA</b> | <b>6867</b> | <b>21</b> | <b>-</b> | <b>-</b>  | <b>-</b> | <b>-</b> |
| UACAGUACUGUGAUAAACUGAAA       | 3261        | 22        | -        | -         | 1-A      | -        |
| UACAGUACUGUGAUAAACUGAAAA      | 606         | 23        | -        | -         | 2-AA     | -        |
| UACAGUACUGUGAUAAACUGAAAAA     | 195         | 24        | -        | -         | 3-AAA    | -        |
| UACAGUACUGUGAUAAACUGAAC       | 25          | 22        | -        | -         | 1-C      | -        |
| UACAGUACUGUGAUAAACUGAACAA     | 18          | 24        | -        | -         | 3-CAA    | -        |
| UACAGUACUGUGAUAAACUGAAG       | 1492        | 22        | -        | 1-down G  | -        | -        |
| UACAGUACUGUGAUAAACUGAAGA      | 168         | 23        | -        | 2-down GA | -        | -        |
| UACAGUACUGUGAUAAACUGAAGAA     | 85          | 24        | -        | 3-down GA | -        | -        |
| UACAGUACUGUGAUAAACUGAAGU      | 31          | 23        | -        | 1-down G  | 1-U      | -        |
| UACAGUACUGUGAUAAACUGAAU       | 369         | 22        | -        | -         | 1-U      | -        |
| UACAGUACUGUGAUAAACUGAAUAA     | 32          | 24        | -        | -         | 3-UAA    | -        |
| UACAGUACUGUGAUAAACUGAC        | 61          | 21        | -        | 1-up A    | 1-C      | -        |
| UACAGUACUGUGAUAAACUGACC       | 28          | 22        | -        | 1-up A    | 2-CC     | -        |
| UACAGUACUGUGAUAAACUGACU       | 22          | 22        | -        | 1-up A    | 2-CU     | -        |
| UACAGUACUGUGAUAAACUGAU        | 23          | 21        | -        | 1-up A    | 1-C      | -        |
| UACAGUACUGUGAUAAACUGAUU       | 11          | 22        | -        | 1-up A    | 2-UU     | -        |
| UACAGUACUGUGAUAAACUGU         | 94          | 20        | -        | 2-up AA   | 1-C      | -        |
| UACAGUACUGUGAUAAUUGA          | 15          | 20        | -        | 1-up A    | -        | 7UC      |
| UACAGUACUGUGAUACCUGAA         | 15          | 21        | -        | -         | -        | 6CA      |
| UACAGUACUGUGAUCACUGA          | 13          | 20        | -        | 1-up A    | -        | 5CA      |
| UACAGUACUGUGAUCACUGAA         | 17          | 21        | -        | -         | -        | 5CA      |
| UACAGUACUGUUUAUAAACUGA        | 10          | 20        | -        | 1-up A    | -        | 2UG      |
| UACAGUACUGUUUAUAAACUGAA       | 12          | 21        | -        | -         | -        | 2UG      |
| UACAGUACUUUGAUAAACUGA         | 11          | 20        | -        | 1-up A    | -        | 1-UG     |
| UACAGUAGUGUGAUAAACUGA         | 14          | 20        | -        | 1-up A    | -        | 8GC      |
| UACAGUAGUGUGAUAAACUGAA        | 15          | 21        | -        | -         | -        | 8GC      |
| UACAGUAGUGUGAUAAACUGAAA       | 14          | 22        | -        | -         | 1-A      | 8GC      |
| UACAGUAUUGUGAUAAACUGAA        | 15          | 21        | -        | -         | -        | 8UC      |

|                       |    |    |   |        |   |     |
|-----------------------|----|----|---|--------|---|-----|
| UACAUUACUGUGAUAACUGA  | 14 | 20 | - | 1-up A | - | 5UG |
| UACAUUACUGUGAUAACUGAA | 13 | 21 | - | -      | - | 5UG |
| UCCAGUACUGUGAUAACUGA  | 11 | 20 | - | 1-up A | - | 2CA |
| UCCAGUACUGUGAUAACUGAA | 11 | 21 | - | -      | - | 2CA |

---
